# Supplementary material for: Smaller = Denser, and the Brain Knows It: Natural Statistics of Object Density Shape Weight Expectations
Source: PLoS One. 2015 Mar 13;10(3):e0119794. doi: 10.1371/journal.pone.0119794 (PMC4358826; doi:10.1371/journal.pone.0119794)
Supplement: S2 Dataset — (XLSX) [file pone.0119794.s003.xlsx]

## Sheet: Liftable
Name of object	Link	Original dim units	Dimension 1	Dim1 in cm	Dimension 2	Dim2 in cm	Dimension 3	Dim3 in cm		Original weight units	Weight	Weight in grams		Notes/divisor	Volume (cc)	Density (g/cc)
Swingline stapler	http://www.amazon.com/Swingline-Limited-Edition-Business-S7074736E/dp/B0006HUQZ6/ref=lp_1069342_1_2?ie=UTF8&qid=1372875583&sr=1-2	inches	8.2	20.828	5.7	14.478	2	5.08		pounds	1.2	544.31			1531.86	0.355326
Scotch tape dispenser	http://www.amazon.com/Scotch-Desk-Tape-Dispenser-Black/dp/B00006IF79/ref=pd_sim_op_4	inches	2.7	6.858	6.5	16.51	2.7	6.858		pounds	2	907.184			776.501	1.1683
Fiskars scissors	http://www.amazon.com/Fiskars-01-004253-Recycled-Everyday-Scissors/dp/B002M9EUO4/ref=pd_sim_op_4	inches	0.6	1.524	3.5	8.89	9.9	25.146		ounces	3.4	96.883			340.687	0.284375
Scientific Calculator	http://www.amazon.com/Texas-Instruments-TI-30XA-Scientific-Calculator/dp/B00000JBNS/ref=sr_1_3?ie=UTF8&qid=1372877966&sr=8-3&keywords=Scientific+Calculator	inches	0.8	2.032	3.1	7.874	6	15.24		ounces	4.8	136.078			243.84	0.558062
iPhone 5	http://www.amazon.com/Apple-iPhone-16GB-White-Unlocked/dp/B0097CZJEO/ref=sr_1_1?s=electronics&ie=UTF8&qid=1372878342&sr=1-1&keywords=iphone+5	inches	2.5	6.35	0.5	1.27	4.5	11.43		ounces	8	226.796			92.1772	2.46043
16-ounce Hammer	http://www.amazon.com/TEKTON-3016-8-oz-Tubular-Hammer/dp/B000NPUJZ8/ref=sr_1_3?ie=UTF8&qid=1381905547&sr=8-3&keywords=hammer	inches	10.1	25.654	4.1	10.414	1.1	2.794		ounces	9.6	102.058			746.447	0.136725
College Ruled 70pg Notebook	http://www.amazon.com/Spiral%C2%AE-One-Subject-College-Ruled-Notebook-05512/dp/B000053HJJ/ref=sr_1_9?s=office-products&ie=UTF8&qid=1372878796&sr=1-9&keywords=notebook	inches	10.5	26.67	0.5	1.27	8.2	20.828		ounces	9.3	263.65			705.463	0.373727
Twine	http://www.amazon.com/Koch-5480307-520-Feet-Twisted-Natural/dp/B00775PRJ0/ref=sr_1_1?s=office-products&ie=UTF8&qid=1372883508&sr=1-1&keywords=twine	inches	3.9	9.906	3.4	8.636	3.4	8.636		pounds	1	453.592			738.794	0.613962
Biological learning and control book	http://www.amazon.com/Biological-Learning-Control-Representations-Computational/dp/0262016966/ref=sr_1_1?s=books&ie=UTF8&qid=1372883692&sr=1-1&keywords=biological+learning+and+control	inches	7	17.78	0.7	1.778	9	22.86		pounds	1.6	725.747			722.67	1.00426
Whiteboard eraser	http://www.amazon.com/Erase-Board-Eraser-Height-81505/dp/B000SHQ73Y/ref=sr_1_1?ie=UTF8&qid=1372884004&sr=8-1&keywords=whiteboard+eraser	inches	2.1	5.334	5.2	13.208	1.2	3.048		ounces	1.8	51.0291			214.736	0.237636
Kix	http://www.amazon.com/Kix-464416956319-Cereal-12-oz/dp/B0042N2KDG/ref=sr_1_13?s=grocery&ie=UTF8&qid=1372884575&sr=1-13&keywords=kix	inches	12	30.48	8	20.32	3	7.62		ounces	15.7	445.087			4719.47	0.0943086
Mouse	http://www.amazon.com/Logitech-B100-TAA-Optical-USB-Mouse/dp/B003L62T7W/ref=sr_1_3?ie=UTF8&qid=1372885022&sr=8-3&keywords=mouse	inches	3.2	8.128	5	12.7	1.7	4.318		ounces	3.8	107.728			445.728	0.24169
iPod	http://www.amazon.com/Apple-classic-Black-Generation-NEWEST/dp/B001F7AHOG/ref=sr_1_3?s=electronics&ie=UTF8&qid=1372885182&sr=1-3&keywords=ipod	inches	2.4	6.096	0.4	1.016	4.1	10.414		ounces	5	141.748			17.079	8.29954
8-inch Vizio tablet	http://www.amazon.com/VIZIO-8-Inch-Tablet-WiFi-VTAB1008/dp/B005B9G79I/ref=sr_1_1?s=electronics&ie=UTF8&qid=1372885300&sr=1-1&keywords=vizio+tablet	inches	0.48	1.2192	6.6	16.764	8.1	20.574		pounds	1.2	544.31			420.505	1.29442
Flashlight	http://www.amazon.com/UltraFire-WF502B-CREE-Lumens-Flashlight/dp/B005E48K6I/ref=pd_sbs_e_1	mm	132	13.2	32	3.2	32	3.2		grams	154	154			135.168	1.13932
DirecTV remote	http://www.amazon.com/DirecTV-RC65-4-Device-Universal-Remote/dp/B003ID6XN4/ref=sr_1_4?ie=UTF8&qid=1372885673&sr=8-4&keywords=tv+remote	inches	10.9	27.686	1.6	4.064	4.6	11.684		pounds	1	453.592			1314.64	0.345032
Sensation and Perception, 3rd edition, Wolfe	http://www.amazon.com/Sensation-Perception-Third-Jeremy-Wolfe/dp/087893572X/ref=sr_1_1?s=books&ie=UTF8&qid=1372887750&sr=1-1&keywords=sensation+and+perception+wolfe+3rd+edition	inches	8.8	22.352	1.1	2.794	11.2	28.448		pounds	3.8	1723.65			1776.62	0.970185
Portable phone	http://www.amazon.com/VTech-CS6409-Accessory-Handset-Cordless/dp/B004OA6VU0/ref=sr_1_15?ie=UTF8&qid=1372887867&sr=8-15&keywords=portable+phone+handset	inches	3.3	8.382	5.1	12.954	8.5	21.59		ounces	12.8	362.874			2344.25	0.154793
Large salsa jar	http://www.amazon.com/Chi-Chis-Medium-Thick-Chunky/dp/B0060YFMO4/ref=sr_1_13?ie=UTF8&qid=1372887958&sr=8-13&keywords=salsa	inches	11	27.94	4	10.16	4	10.16		pounds	5	2267.96			2884.12	0.78636
Paper napkins	http://www.amazon.com/Vanity-Fair-Dinner-Impressions-Napkins/dp/B0029TTAG0/ref=sr_1_2?ie=UTF8&qid=1372888066&sr=8-2&keywords=paper+napkins	inches	10.9	27.686	7.6	19.304	8.9	22.606		pounds	3.7	1678.29			12081.8	0.138911
Pillsbury creamy supreme	http://www.amazon.com/Pillsbury-Creamy-Supreme-Cheese-Frosting/dp/B000R36GP8/ref=sr_1_2?ie=UTF8&qid=1372888190&sr=8-2&keywords=pillsbury+creamy+supreme	inches	4	10.16	3.5	8.89	4	10.16		pounds	1.1	498.951			917.676	0.543712
Vitamin C tablets	http://www.amazon.com/Vit-500-Bioflavonoids-250-caps/dp/B000155KAO/ref=sr_1_18?s=grocery&ie=UTF8&qid=1372888391&sr=1-18&keywords=vitamin+c	inches	5.9	14.986	2.9	7.366	2.8	7.112		ounces	10.7	303.34			785.071	0.386385
Kitchen timer	http://www.amazon.com/Browne-Foodservice-HP2110-Mechanical-Classic/dp/B0000BYCNZ/ref=sr_1_3?ie=UTF8&qid=1372888492&sr=8-3&keywords=kitchen+timer	inches	4.5	11.43	2.5	6.35	6.5	16.51		ounces	12	340.194			1198.3	0.283896
Pencils	http://www.amazon.com/Dixon-Ticonderoga-Pre-Sharpened-Microban-13830/dp/B006CSPZK4/ref=sr_1_13?ie=UTF8&qid=1372888584&sr=8-13&keywords=pencils	inches	8.5	21.59	0.9	2.286	3	7.62		ounces	6.4	6.04789		div by 30	12.5361	0.482438
Concert Ukulele	http://www.amazon.com/Oscar-Schmidt-OU5-Concert-Ukulele/dp/B000A39GUC/ref=sr_1_1?s=electronics&ie=UTF8&qid=1372888879&sr=1-1&keywords=ukulele	inches	24	60.96	3.5	8.89	12	30.48		pounds	4	1814.37			16518.2	0.109841
Macbook pro	http://www.amazon.com/Apple-MacBook-MD101LL-13-3-Inch-VERSION/dp/B0074703CM/ref=sr_1_1?s=pc&ie=UTF8&qid=1372888390&sr=1-1&keywords=macbook+pro+laptop	inches	12.78	32.4612	8.94	22.7076	0.95	2.413		pounds	4.5	2041.16			1778.66	1.14758
Expo dry erase markers	http://www.amazon.com/Expo-Chisel-Erase-Markers-80001/dp/B00006JNK2/ref=sr_1_2?s=office-products&ie=UTF8&qid=1372888761&sr=1-2&keywords=expo+dry+erase+markers	inches	2.3	5.842	3.2	8.128	5	12.7		ounces	7.5	17.7184		div by 12	50.2537	0.35258
9V batteries	http://www.amazon.com/Energizer-9-Volt-Alkaline-Industrial-Batteries/dp/B00006LHDL/ref=sr_1_5?s=office-products&ie=UTF8&qid=1372888895&sr=1-5&keywords=9v+batteries	inches	8	20.32	2	5.08	1	2.54		pounds	2	75.5987		div by 12	21.8494	3.45999
Bose Headphones	http://www.amazon.com/Bose%C2%AE-QuietComfort%C2%AE-Acoustic-Cancelling%C2%AE-Headphones/dp/B0054JJ0QW/ref=sr_1_1?s=aht&ie=UTF8&qid=1372889203&sr=1-1	inches	7.5	19.05	3	7.62	6.5	16.51		ounces	7.4	209.786			2396.61	0.0875347
Shipping tape	http://www.amazon.com/Scotch-Heavy-Shipping-Packaging-Clear/dp/B003W0P2SA/ref=sr_1_1?ie=UTF8&qid=1372889228&sr=8-1&keywords=shipping+tape	inches	2.5	6.35	2.8	7.112	4	10.16		ounces	3.8	107.728			458.838	0.234785
Wallet	http://www.amazon.com/Leather-Classic-Alpine-Luxurious-Lambskin/dp/B0073MLZ70/ref=pd_sim_a_1	inches	4.75	12.065	3.625	9.2075	1	2.54		ounces	4	113.398			282.165	0.401886
Power strip	http://www.amazon.com/Fellowes-6-Outlet-15-Foot-Power-99026/dp/B00006HQR8/ref=pd_sim_op_6	inches	1.9	4.826	10.9	27.686	1.6	4.064		pounds	1.8	816.466			543.002	1.50362
Kindle E-readers	http://www.amazon.com/dp/B007HCCNJU/ref=sa_menu_kdptq	inches	6.5	16.51	4.5	11.43	0.34	0.8636		ounces	5.98	169.53			162.969	1.04026
Macbook power adapter	http://www.amazon.com/Apple-Magsafe-Portable-Adapter-MacBook/dp/B004L6MLPQ/ref=pd_sim_e_6	inches	7.3	18.542	6.1	15.494	2.5	6.35		pounds	1	453.592			1824.29	0.24864
Moleskin planner	http://www.amazon.com/Moleskine-Planner-Weekly-Notebook-Diaries/dp/8866135909/ref=sr_1_1?ie=UTF8&qid=1372889980&sr=8-1&keywords=moleskine+planner	inches	5.6	14.224	0.5	1.27	8.4	21.336		ounces	10.6	300.505			385.424	0.779674
Post-It recycled sticky notes	http://www.amazon.com/Recycled-Sticky-6-Inches-Assorted-Tropical/dp/B003HD03IQ/ref=sr_1_8?s=office-products&ie=UTF8&qid=1372890561&sr=1-8&keywords=post+it+notes	inches	0.8	2.032	4	10.16	6	15.24		ounces	5.6	158.757			314.632	0.504581
Wooden spoon	http://www.amazon.com/Helen-Chens-Kitchen-12-inch-Bamboo/dp/B0041HRPWY/ref=pd_sim_k_7	inches	12	30.48	2.7	6.858	0.5	1.27		ounces	3.2	90.7184			265.47	0.341727
Grill wire brush	http://www.amazon.com/Heavy-Grill-Brush-Scraper-Commercial/dp/B0096S6QH8/ref=sr_1_7?s=lawn-garden&ie=UTF8&qid=1372891156&sr=1-7&keywords=woks	inches	11	27.94	2	5.08	0.8	2.032		ounces	8	226.796			288.412	0.78636
Spatula	http://www.amazon.com/Norpro-906-Nonstick-13-Inch-Slotted/dp/B000HJ76DS/ref=sr_1_10?s=home-garden&ie=UTF8&qid=1381907537&sr=1-10&keywords=spatula	inches	13	33.02	3	7.62	0.8	2.032		ounces	2.4	68.0388			511.276	0.133076
12-inch Frying pan	http://www.amazon.com/Ozeri-Textured-Ceramic-Non-Stick-Coating/dp/B005473FMO/ref=sr_1_3?s=home-garden&ie=UTF8&qid=1372890856&sr=1-3&keywords=frying+pan	inches	20	50.8	12	30.48	3	7.62		pounds	2.8	1270.06			11798.7	0.107644
Box of penne pasta	http://www.amazon.com/Philips-HX9332-05-DiamondClean-Rechargeable/dp/B0052JN7XG/ref=sr_1_11?s=hpc&ie=UTF8&qid=1381908759&sr=1-11&keywords=electric+toothbrush	inches	13.1	33.274	9.1	23.114	5.3	13.462		pounds	5.4	2449.4			1294.2	1.8926
Men's wallet	http://www.amazon.com/Tommy-Hilfiger-Cambridge-Passcase-Brown/dp/B00422M6JK/ref=sr_1_4?s=apparel&ie=UTF8&qid=1372891767&sr=1-4&keywords=books	inches	0.5	1.27	4.5	11.43	3.5	8.89		ounces	8.8	252.116			129.048	1.95366
Toothpaste	http://www.amazon.com/Colgate-Whitening-Anticavity-Antigingivitis-Toothpaste/dp/B00006L9LP/ref=sr_1_6?ie=UTF8&qid=1372891399&sr=8-6&keywords=toothpaste	inches	8.7	22.098	1.8	4.572	1.4	3.556		ounces	7.2	204.116			359.27	0.568142
Hairbrush	http://www.amazon.com/SHARKK-Brush-Professional-Detangling-Shower/dp/B008O4YM4Y/ref=sr_1_3?s=hpc&ie=UTF8&qid=1372891483&sr=1-3&keywords=hairbrush	inches	9	22.86	3.5	8.89	1.5	3.81		ounces	3	85.0485			774.289	0.109841
Comb	http://www.amazon.com/Kent-Hand-Made-Large-Coarse-Dressing/dp/B000YB1TV4/ref=sr_1_6?s=hpc&ie=UTF8&qid=1372891539&sr=1-6&keywords=comb	inches	7.2	18.288	0.2	0.508	1.7	4.318		ounces	1.6	45.3592			40.1155	1.13071
Electric toothbrush	http://www.amazon.com/Philips-HX9332-05-DiamondClean-Rechargeable/dp/B0052JN7XG/ref=sr_1_11?s=hpc&ie=UTF8&qid=1381908759&sr=1-11&keywords=electric+toothbrush	inches	1.3	3.302	1.1	2.794	7.5	19.05		ounces	14.4	408.233			175.751	2.32279
Electric razor	http://www.amazon.com/Philips-Norelco-Reflex-Action-Shaving/dp/B001AJ6QNA/ref=sr_1_6?s=hpc&ie=UTF8&qid=1372891663&sr=1-6&keywords=electric+razor	inches	9.4	23.876	6.3	16.002	3.9	9.906		ounces	12	340.194			3784.72	0.0898861
12-inch plates	http://www.amazon.com/10-Strawberry-Street-Catering-2-Inch/dp/B002LAAFYS/ref=sr_1_4?ie=UTF8&qid=1372891735&sr=8-4&keywords=plates	inches	13	33.02	13	33.02	7	17.78		pounds	23	869.385		div by 12	1615.49	0.538155
Fry pan	http://www.amazon.com/T-fal-A9108274-Specialty-Nonstick-Dishwasher/dp/B000EM9PTQ/ref=sr_1_cc_1?s=aps&ie=UTF8&qid=1372891996&sr=1-1-catcorr&keywords=cooking+pan	inches	23	58.42	12	30.48	6.5	16.51		pounds	4.6	2086.52			29398.4	0.0709741
Forks	http://www.amazon.com/Hampton-Forge-Silversmiths-Ventura-6-Piece/dp/B003AUOKUI/ref=sr_1_10?s=home-garden&ie=UTF8&qid=1372891881&sr=1-10&keywords=forks	inches	8	20.32	1.1	2.794	11	27.94		ounces	10.1	47.7217		div by 6	264.378	0.180505
Mini fan	http://www.amazon.com/Coleman-2000009219-Cool-Zephyr-Mini/dp/B0019OMY8W/ref=sr_1_3?s=appliances&ie=UTF8&qid=1372892350&sr=1-3&keywords=hand+held+fan	inches	8	20.32	3.7	9.398	1.3	3.302		ounces	1.6	45.3592			630.574	0.0719332
Baseball	http://www.amazon.com/Rawlings-Official-Major-League-Baseball/dp/B000096OJL/ref=pd_sbs_sg_3	inches	3	7.62	3	7.62	3	7.62		ounces	5.6	158.757			442.451	0.358813
Hand vacuum	http://www.amazon.com/Black-Decker-CHV1510-Dustbuster-15-6-Volt/dp/B004412GTO/ref=sr_1_1?s=appliances&ie=UTF8&qid=1372892518&sr=1-1&keywords=hand+held+vacuums	inches	8	20.32	14.3	36.322	5.5	13.97		pounds	1	453.592			10310.7	0.0439922
Basketball	http://www.amazon.com/Spalding-Official-Indoor-Outdoor-Basketball/dp/B000A7OUE0/ref=sr_1_2?s=sporting-goods&ie=UTF8&qid=1372892532&sr=1-2&keywords=basketball	inches	8.7	22.098	8.7	22.098	8.7	22.098		pounds	1.6	725.747			10790.9	0.0672553
Biological Psychology textbook	http://www.amazon.com/Biological-Psychology-Introduction-Behavioral-Neuroscience/dp/0878935576/ref=sr_1_2?s=books&ie=UTF8&qid=1372892882&sr=1-2&keywords=biological+psychology+breedlove+6th	inches	10.7	27.178	8.7	22.098	0.8	2.032		pounds	3.4	1542.21			1220.38	1.26372
Golf ball	http://www.amazon.com/Wilson-Titanium-Ball-18-Pack/dp/B003BF8NSM/ref=sr_1_1?s=sporting-goods&ie=UTF8&qid=1372892833&sr=1-1&keywords=golf+ball	inches	5.6	14.224	5.4	13.716	3.9	9.906		pounds	2.1	52.9191		div by 18	107.368	0.492875
Samsung Focus Flash smartphone	http://www.amazon.com/Samsung-Focus-Flash-Windows-Phone/dp/B0061QS9BO/ref=sr_1_1?s=wireless&ie=UTF8&qid=1372893155&sr=1-1&keywords=samsung+focus+flash	inches	4.6	11.684	2.3	5.842	0.4	1.016		ounces	14.4	408.233			69.3501	5.88655
Motor oil (full)	http://www.amazon.com/Mag-62939-SAE-10W-30-Motor/dp/B0077K8O2M/ref=sr_1_2?ie=UTF8&qid=1372893131&sr=8-2&keywords=motor+oil	inches	12.4	31.496	7.7	19.558	4.8	12.192		pounds	9.2	4173.05			7510.26	0.555646
Ipad	http://www.amazon.com/Apple-MC705LL-Wi-Fi-Black-Generation/dp/B00746LVOM/ref=sr_1_1?ie=UTF8&qid=1372893368&sr=8-1&keywords=Apple+ipad	inches	9.5	24.13	7.31	18.5674	0.37	0.9398		pounds	1.4	635.029			421.06	1.50817
Coca cola can	http://www.amazon.com/Coca-Cola-Classic-12-Ounce-Cans/dp/B004JXBHQK/ref=pd_sbs_gro_2	inches	18	45.72	12	30.48	5	12.7		pounds	21.7	410.123		div by 24	737.418	0.556161
Rubik's cube (puzzle cube)	http://www.amazon.com/Dayan-ZhanChi-3x3x3-6-Color-Stickerless/dp/B005KOWHES/ref=pd_sim_t_2	inches	3	7.62	3	7.62	3	7.62		ounces	5	141.748			442.451	0.320369
pillow pet	http://www.amazon.com/Pillow-Pets-Miss-Lady-Bug/dp/B00286H22S/ref=sr_1_2?s=toys-and-games&ie=UTF8&qid=1372893809&sr=1-2&keywords=pillow	inches	13.3	33.782	10	25.4	7.1	18.034		pounds	2	907.184			15474.3	0.0586252
Nintendo DS	http://www.amazon.com/Nintendo-DS-Lite-Cobalt-Black/dp/B001290A3U/ref=sr_1_1?s=videogames&ie=UTF8&qid=1372893980&sr=1-1&keywords=nintendo+Ds	inches	7.5	19.05	5	12.7	1.8	4.572		ounces	12.8	362.874			1106.13	0.328058
stress ball	http://www.amazon.com/Toysmith-32090-Isoflex-Stress-Ball/dp/B001BPYBTE/ref=sr_1_1?s=toys-and-games&ie=UTF8&qid=1372893712&sr=1-1&keywords=stress+ball	inches	2.2	5.588	2.2	5.588	2.2	5.588		ounces	3.2	90.7184			174.489	0.519908
Camcorder	http://www.amazon.com/Philips-HX9332-05-DiamondClean-Rechargeable/dp/B0052JN7XG/ref=sr_1_11?s=hpc&ie=UTF8&qid=1381908759&sr=1-11&keywords=electric+toothbrush	inches	4.6	11.684	2.1	5.334	2.2	5.588		ounces	6.2	175.767			348.258	0.504703
Peanut butter jar	http://www.amazon.com/JIF-Peanut-Butter-Creamy-Pack/dp/B001KU2TZI/ref=pd_sim_sbs_gro_26	inches	8	20.32	4	10.16	7	17.78		pounds	5	1133.98		div by 2	1835.35	0.617855
Tuna can	http://www.amazon.com/Bumble-Bee-Solid-White-Albacore/dp/B002XPPAA0/ref=pd_sbs_gro_1	inches	13.6	34.544	10.1	25.654	2.6	6.604		pounds	9.1	171.987		div by 24	243.85	0.705297
Loaf of bread	http://www.amazon.com/Fiber-One-Whole-Wheat-Bread/dp/B0099X2AE8/ref=pd_sbs_gro_1	inches	11	27.94	6	15.24	5	12.7		pounds	3	680.388		div by 2	2703.87	0.251635
Fujifilm camera	http://www.amazon.com/Fujifilm-FinePix-S4200-Digital-Camera/dp/B006T7QWGO/ref=sr_1_1?ie=UTF8&qid=1372894373&sr=8-1&keywords=camera	inches	6.7	17.018	5.5	13.97	4.1	10.414		ounces	15.8	447.922			2475.84	0.180917
Shampoo	http://www.amazon.com/American-Moisturizing-Shampoo-33-8-Ounce-Package/dp/B000GG0NT6/ref=sr_1_8?ie=UTF8&qid=1372894684&sr=8-8&keywords=shampoo	inches	2.5	6.35	1.5	3.81	7.2	18.288		ounces	8.8	249.476			442.451	0.563849
Canon Powershot camera	http://www.amazon.com/Canon-PowerShot-Digital-Camera-Optical/dp/B0075SUHQC/ref=sr_1_2?ie=UTF8&qid=1372894516&sr=8-2&keywords=camera	inches	0.8	2.032	3.7	9.398	2.1	5.334		ounces	3.8	107.728			101.862	1.05759
Graphing calculator	http://www.amazon.com/Texas-Instruments-TI-84-Graphing-Calculator/dp/B0001EMM0G/ref=sr_1_1?ie=UTF8&qid=1372894926&sr=8-1&keywords=graphing+calculator	inches	3	7.62	3.9	9.906	0.5	1.27		pounds	2	907.184			95.8643	9.46321
Ipod nano 6th generation	http://support.apple.com/kb/SP593	inches	1.48	3.7592	1.61	4.0894	0.35	0.889		ounces	0.74	20.9786			13.6665	1.53504
Bar of soap	http://www.amazon.com/Ivory-Original-16-Count-Bath-Ounce/dp/B0076J9RZW/ref=sr_1_4?ie=UTF8&qid=1372895616&sr=8-4&keywords=soap	inches	9.1	23.114	2	5.08	7.8	19.812		pounds	4.2	119.068		div by 16	145.394	0.818931
Pillar candle	http://www.amazon.com/Root-Candles-Scented-Timberline-Pillar/dp/B000OYG2RC/ref=pd_sim_sbs_hg_7	inches	3.5	8.89	3.5	8.89	6.5	16.51		pounds	1	453.592			1304.82	0.347628
Sunglasses case	http://www.amazon.com/Luxury-Divas-Black-Clamshell-Glasses/dp/B000NRV612/ref=pd_sbs_shoe_6	inches	2.5	6.35	6	15.24	3	7.62		ounces	7.7	218.291			737.418	0.296021
Deodorant	http://www.amazon.com/Dove-sleeveless-Beauty-Finish-Deodorant/dp/B007SLXBW8/ref=sr_1_2?ie=UTF8&qid=1372897109&sr=8-2&keywords=deodorant	inches	5.4	13.716	2.1	5.334	1.2	3.048		ounces	3.8	107.728			222.995	0.483096
Xbox 360 controller	http://www.amazon.com/Xbox-360-Wireless-Controller-Glossy-Black/dp/B003ZSP0WW/ref=sr_1_1?ie=UTF8&qid=1372896088&sr=8-1&keywords=xbox+controller	inches	8	20.32	2.8	7.112	7	17.78		ounces	13.6	385.553			2569.49	0.15005
Playstation 3 controller	http://www.amazon.com/PlayStation-Dualshock-Wireless-Controller-Black-3/dp/B0015AARJI/ref=sr_1_1?ie=UTF8&qid=1372896237&sr=8-1&keywords=playstation+controller	inches	8.8	22.352	5.8	14.732	3.5	8.89		ounces	10.2	289.165			2927.39	0.0987792
Apple wireless keyboard	http://www.amazon.com/Apple-Wireless-Keyboard-MC184LL-B/dp/B005DLDO4U/ref=sr_1_1?ie=UTF8&qid=1372896549&sr=8-1&keywords=apple+wireless+keyboard	inches	12.8	32.512	1.4	3.556	7.3	18.542		ounces	13.6	385.553			2143.69	0.179855
Wii controller	http://www.target.com/p/wii-remote-plus-black-nintendo-wii/-/A-14277957	inches	8.47	21.5138	2.52	6.4008	2.05	5.207		pounds	0.57	258.547			717.033	0.36058
Screwdriver	http://www.amazon.com/STANLEY-TOOLS-68-012-All-in-One-Screwdriver/dp/B00009V431/ref=sr_1_1?ie=UTF8&qid=1372897970&sr=8-1&keywords=screwdriver	inches	7.7	19.558	1.5	3.81	1.5	3.81		ounces	6.4	181.437			283.906	0.639074
Light bulbs (4-pack)	http://www.amazon.com/GE-Lighting-41028-60-Watt-4-Pack/dp/B000BPILBY/ref=sr_1_6?ie=UTF8&qid=1372898042&sr=8-6&keywords=light+bulbs	inches	2.4	6.096	2.4	6.096	4.4	11.176		ounces	1.4	39.6893			415.314	0.0955646
Pliers	http://www.amazon.com/Stanley-84-097-6-Inch-Joint-Plier/dp/B0001IW892/ref=sr_1_2?ie=UTF8&qid=1372898126&sr=8-2&keywords=pliers	inches	8.8	22.352	2.4	6.096	0.6	1.524		ounces	7.2	204.116			207.657	0.98295
Cordless drill	http://www.amazon.com/Black-Decker-9099KC-7-2-Volt-Cordless/dp/B0002TXNX0/ref=sr_1_3?ie=UTF8&qid=1372898193&sr=8-3&keywords=drill	inches	9.1	23.114	8.9	22.606	3	7.62		pounds	3	1360.78			3981.56	0.341769
Paper towels	http://www.amazon.com/Bounty-Basic-Paper-Towel-Select-A-Size/dp/B00AV5K7TI/ref=sr_1_5?ie=UTF8&qid=1372898252&sr=8-5&keywords=paper+towels	inches	9.4	23.876	14.4	36.576	11	27.94		pounds	2.5	188.997		div by 6	4066.61	0.0464752
Pillow	http://www.amazon.com/Adorable-Adored-Granny-Pillow-Standard/dp/B0091PYX6M/ref=sr_1_110?s=home-garden&ie=UTF8&qid=1381903850&sr=1-110&keywords=pillows	inches	26	66.04	20	50.8	2	5.08		pounds	1.2	544.31			17042.5	0.0319383
Baseball bat	http://www.amazon.com/Mizuno-MZC271-Maple-Composite-Bat/dp/B008ER1CM6/ref=pd_sbs_sg_54	inches	32	81.28	2.5	6.35	2.5	6.35		pounds	2	907.184			3277.41	0.276799
Boxing glove	http://www.amazon.com/Everlast-ProTex2-EverGel-Training-Gloves/dp/B002ZVEV5M/ref=pd_sbs_sg_1	inches	14.4	36.576	6.8	17.272	5.1	12.954		pounds	1.8	408.233		div by 2	4091.78	0.0997689
Dustbuster	http://www.amazon.com/Dirt-Devil-AccuCharge-Cordless-BD10045RED/dp/B002D47XO2/ref=sr_1_12?ie=UTF8&qid=1372899091&sr=8-12&keywords=dustbuster	inches	6	15.24	8.8	22.352	12.8	32.512		pounds	4.6	2086.52			11075	0.188399
wooden rolling pin	http://www.amazon.com/Good-Cook-Classic-Wood-Rolling/dp/B000ARPJRM/ref=sr_1_6?ie=UTF8&qid=1372912411&sr=8-6&keywords=rolling+pin	inches	18	45.72	2.5	6.35	2.5	6.35		pounds	1	453.592			1843.54	0.246043
Broom	http://www.amazon.com/Rubbermaid-Commercial-Polyethylene-Bristles-637400BLA/dp/B001TQFJQY/ref=sr_1_4?s=industrial&ie=UTF8&qid=1372913071&sr=1-4&keywords=broom	inches	36	91.44	8.9	22.606	1.5	3.81		ounces	9.6	272.155			7875.62	0.0345567
Harry Potter And The Sorcerer's Stone	http://www.amazon.com/Harry-Potter-Sorcerers-Stone-Book/dp/059035342X/ref=sr_1_cc_1?s=aps&ie=UTF8&qid=1372913318&sr=1-1-catcorr&keywords=Harry+Potter+and+the+Sorcerer%27s+stone	inches	7.6	19.304	0.8	2.032	5.2	13.208		pounds	2	907.184			518.093	1.751
GPS	http://www.amazon.com/TomTom-4-3-Inch-Navigator-Lifetime-Assistance/dp/B007M52QEE/ref=sr_1_1?s=car&ie=UTF8&qid=1372913744&sr=1-1&keywords=GPS	inches	0.1	0.254	4.7	11.938	3.2	8.128		ounces	6.9	195.612			24.6461	7.9368
Flexible Desk Lamp	http://www.amazon.com/Boston-Harbor-TL-TB-170-BK3L-Flexible-Black/dp/B002SDNSF6/ref=sr_1_3?ie=UTF8&qid=1373056409&sr=8-3&keywords=Desk+Lamp	inches	21	53.34	11.8	29.972	8	20.32		pounds	2.6	1179.34			32485.7	0.0363033
Mesh Round Wastebasket	http://www.amazon.com/Rolodex-22351-round-wastebasket-diameter/dp/B00006IALF/ref=pd_sim_hi_5	inches	11.5	29.21	11.5	29.21	14.3	36.322		pounds	1.6	725.747			30990.8	0.0234181
Coffee Mate Creamer 50oz	http://www.amazon.com/gp/product/B001W14THQ/ref=s9_psimh_gw_p325_d0_i5?pf_rd_m=ATVPDKIKX0DER&pf_rd_s=center-2&pf_rd_r=11EGZ89F179F7ZR5Z4J8&pf_rd_t=101&pf_rd_p=1389517282&pf_rd_i=507846	inches	9	22.86	6.5	16.51	6.5	16.51		pounds	4.3	1950.45			6231.18	0.313014
measuring tape	http://www.amazon.com/TEKTON-71953-25-Foot-1-Inch-Measure/dp/B000NPR4FG/ref=sr_1_2?s=hi&ie=UTF8&qid=1381876367&sr=1-2&keywords=measuring+tape	inches	3.2	8.128	1.2	3.048	2.5	6.35		ounces	12	340.194			157.316	2.16249
Alarm clock	http://www.amazon.com/Sony-ICF-C318-Clock-Radio-Alarm/dp/B000MXWSY6/ref=sr_1_1?ie=UTF8&qid=1381873701&sr=8-1&keywords=alarm+clock	inches	6	15.24	6.1	15.494	3.3	8.382		pounds	1.3	589.67			1979.23	0.297929
wireless mouse	http://www.amazon.com/Logitech-910-001822-M510-Wireless-Mouse/dp/B003NR57BY/ref=sr_1_1?ie=UTF8&qid=1381874374&sr=8-1&keywords=wireless+mouse	inches	4.4	11.176	2.5	6.35	1.8	4.572		ounces	6.6	187.107			324.464	0.576664
portable speakers	http://www.amazon.com/Kinivo-ZX100-Portable-Rechargeable-Resonator/dp/B004HHICKC/ref=sr_1_12?s=electronics&ie=UTF8&qid=1381950732&sr=1-12&keywords=speakers	inches	5.8	14.732	4.9	12.446	2.4	6.096		pounds	1	453.592			1117.73	0.405816
Lenovo laptop U310	http://www.amazon.com/Kinivo-ZX100-Portable-Rechargeable-Resonator/dp/B004HHICKC/ref=sr_1_12?s=electronics&ie=UTF8&qid=1381950732&sr=1-12&keywords=speakers	inches	13.1	33.274	8.9	21.844	0.71	1.8034		pounds	3.7	1678.29			1310.78	1.28038
handheld mirror	http://www.amazon.com/Kinivo-ZX100-Portable-Rechargeable-Resonator/dp/B004HHICKC/ref=sr_1_12?s=electronics&ie=UTF8&qid=1381950732&sr=1-12&keywords=speakers	inches	11	27.94	7.8	19.812	2.5	6.35		ounces	10.2	289.165			3515.03	0.0822654
hair straightener	http://www.amazon.com/Remington-Collection-Digital-Ceramic-Straightener/dp/B00EAOWSD4/ref=pd_sbs_bt_1	inches	2.9	7.366	5	12.7	13.8	35.052		pounds	1	453.592			3279.05	0.13833
hair curler	http://www.amazon.com/Infiniti-Professional-Tourmaline-Ceramic-Curling/dp/B000F5AG5E/ref=sr_1_9?s=beauty&ie=UTF8&qid=1381952965&sr=1-9&keywords=hair+curler	inches	6.1	15.494	14.5	36.83	2.5	6.35		pounds	1	453.592			3623.59	0.125178
hair dryer	http://www.amazon.com/Infiniti-Professional-Tourmaline-Ceramic-Curling/dp/B000F5AG5E/ref=sr_1_9?s=beauty&ie=UTF8&qid=1381952965&sr=1-9&keywords=hair+curler	inches	4.5	11.43	10.4	26.416	11	27.94		pounds	1	453.592			8436.06	0.0537682
tub of lotion	http://www.amazon.com/Cetaphil-Moisturizing-Cream/dp/B0087GRBAG/ref=pd_sbs_bt_5	inches	4	10.16	3.6	9.144	3.5	8.89		pounds	1	453.592			825.908	0.549204
Aztec Secrets, Bentonite Clay	http://www.amazon.com/gp/product/B0014P8L9W/ref=s9_hps_bw_g194_ir05?pf_rd_m=ATVPDKIKX0DER&pf_rd_s=center-4&pf_rd_r=1KD4HJDP0YJHQXT3R7KN&pf_rd_t=101&pf_rd_p=1450369802&pf_rd_i=3760911	inches	2	5.08	2	5.08	2	5.08		pounds	1.1	498.951			131.097	3.80598
Stanley 42-324 24-Inch I-Beam 180 Level	http://www.amazon.com/Stanley-42-324-24-Inch-I-Beam-Level/dp/B000NIFC7K/ref=pd_rhf_dp_s_cp_4?ie=UTF8&refRID=16JE6GZ4M0AR562E8NSY	inches	24	60.96	2.4	6.096	1	2.54		pounds	1	453.592			943.895	0.480554
Southwest Specialty Products 30007C Barbasol Can Safe	http://www.amazon.com/Southwest-Specialty-Products-30007C-Barbasol/dp/B000HZ8RN0/ref=pd_rhf_dp_s_cp_13_WCQ9?ie=UTF8&refRID=0CX9QVWJVQ0WMSYTMNAD	inches	10.7	27.178	4.5	11.43	3.4	8.636		ounces	7.2	204.116			2682.73	0.0760854
Scope Dualblast Mouthwash Icy Mint Blast 750 Ml	http://www.amazon.com/Scope-Dualblast-Mouthwash-Mint-Blast/dp/B005NCIJV2/ref=pd_sim_hpc_4	inches	3	7.62	3	7.62	10.3	26.162		pounds	1.8	816.466			1519.08	0.537473
Febreze Stick and Refresh Clean Zest Air Freshener Starter Kit	http://www.amazon.com/Febreze-Stick-Refresh-Freshener-Starter/dp/B00AYCXL4G/ref=pd_sbs_hpc_4	inches	1.5	3.81	4.2	10.668	6.2	15.748		ounces	1.4	39.6893			640.079	0.0620069
Febreze Fabric Refresher Free Air Freshener	http://www.amazon.com/Febreze-Fabric-Refresher-Freshener-Count/dp/B00D2NUUPW/ref=pd_sbs_hpc_28	inches	5	12.7	3	7.62	9.7	24.638		pounds	2	907.184			2384.32	0.380479
Mr. Clean Multi-Surfaces Summer Citrus Antibacterial Liquid Cleaner, 128 Fluid Ounce Bottle	http://www.amazon.com/Mr-Clean-Multi-Surfaces-Antibacterial-Cleaner/dp/B002YTLFBI/ref=pd_sbs_hpc_3	inches	4.9	12.446	7	17.78	11.4	28.956		pounds	8.8	3991.61			6407.67	0.622942
Hellmann's Real Mayonnaise, 15-Ounce Jar	http://www.amazon.com/Hellmanns-Real-Mayonnaise-15-Ounce-Jar/dp/B0052LZ6XI/ref=pd_sim_hpc_9	mL	443							pounds	1.1	498.951			443	1.1263
Campbell's Chicken Noodle Soup, 14.75 Ounce Can	http://www.amazon.com/Campbells-Chicken-Noodle-14-75-Ounce/dp/B005VBD46U/ref=pd_sbs_gro_2	mL	420							grams		418			420	0.995238
Native Forest Organic Sliced Peaches, 15-Ounce Can	http://www.amazon.com/Native-Forest-Organic-Peaches-15-Ounce/dp/B002O19HWU/ref=pd_sim_gro_8	mL	437.5							grams		425			437.5	0.971429
Handi-Snacks - Kraft Crackers'n Cheese Dip, 30/.95oz Snacks	http://www.amazon.com/Handi-Snacks-Kraft-Crackersn-Cheese-Snacks/dp/B00139ZSDG/ref=pd_sim_gro_10	inches	5	12.7	5	12.7	11	27.94		ounces	1	28.3495			4506.44	0.00629088
Advil Tablets Pain Reliever Refill, 50 Two-Packs per Box	http://www.amazon.com/Advil-Tablets-Reliever-Refill-Two-/dp/B0006SW71G/ref=pd_sim_gro_9	inches	5.6	14.224	3.5	8.89	6	15.24		ounces	5.3	150.252			1927.12	0.0779674
Altoids Curiously Strong Mints, Wintergreen, 1.76-Ounce Tins (Pack of 12)	http://www.amazon.com/Altoids-Curiously-Strong-Wintergreen-1-76-Ounce/dp/B000FKL0EU/ref=pd_sim_gro_3	inches	7.5	19.05	7.8	19.812	2	5.08		pounds	1.3	589.67			1917.29	0.307554
Malden Daddy's Girl Expressions Frame, 4 by 6-Inch	http://www.amazon.com/Malden-Daddys-Expressions-Frame-6-Inch/dp/B001FBD9L0/ref=pd_sim_gro_24	inches	5.9	14.986	7.9	20.066	0.7	1.778		ounces	11.2	317.514			534.661	0.593861
Glad Tall Kitchen Drawstring Garbage Bags, White, 13 Gallon	http://www.amazon.com/Glad-Kitchen-Drawstring-Trash-Gallon/dp/B005GSYXHW/ref=pd_sim_hpc_7	inches	8.4	21.336	4.5	11.43	4.6	11.684		pounds	2.7	1224.7			2849.38	0.429812
Reynolds Wrap Aluminum Foil - 250 Square Feet Rolls	http://www.amazon.com/Reynolds-Wrap-Aluminum-Foil-Pack/dp/B001R2NM5U/ref=pd_sim_hg_4	inches	12.5	31.75	2.1	5.334	2.2	5.588		pounds	0.5	226.796			946.353	0.239653
Kirkland Signature Stretch Tite Plastic Food Wrap 750 Sq. Ft.	http://www.amazon.com/Kirkland-Signature-Stretch-Tite-Plastic/dp/B007MWNFBA/ref=pd_sim_hg_14	inches	13.1	33.274	2.9	7.366	2.9	7.366		pounds	2.4	1088.62			1805.38	0.602987

## Sheet: Unliftable
Name of object	Link	Original dim units	Dimension 1	Dim1 in cm	Dimension 2	Dim2 in cm	Dimension 3	Dim3 in cm		Original weight units	Weight	Weight in grams			Volume (cc)	Density (g/cc)
Ikea Hemnes 8-drawer dresser	http://www.ikea.com/us/en/catalog/products/40239274/	cm	160	160	50	50	95	95		kg	61.1	61100			760000	0.0803947
Mattress	http://www.ikea.com/us/en/catalog/products/30188468/	cm	189	189	97	97	20	20		kg	28	28000			366660	0.076365
Ikea Brusali 3-drawer chest	http://www.ikea.com/us/en/catalog/products/80250146/	cm	80	80	48	48	93	93		kg	32.6	32600			357120	0.0912858
Coffee table	http://www.ikea.com/us/en/catalog/products/50136671/	cm	140	140	66	66	47	47		kg	20.5	20500			434280	0.0472046
Bed frame	http://www.ikea.com/us/en/catalog/products/40177520/	cm	197	197	105	105	45	45		kg	43.3	43300			930825	0.0465179
Built-in microwave oven	http://www.ikea.com/us/en/catalog/products/80222219/	cm	75.6	75.6	54	54	45.5	45.5		kg	31.1	31100			185749	0.16743
Double oven	http://www.ikea.com/us/en/catalog/products/30182206/	cm	75.5	75.5	63.8	63.8	129.5	129.5		kg	126	126000			623789	0.201992
arm chair	http://www.ikea.com/us/en/catalog/products/S79927587/	cm	104	104	88	88	88	88		kg	43.2	43200			805376	0.0536395
Refrigerator	http://www.ikea.com/us/en/catalog/products/70203872/	cm	90	90	71	71	174.5	174.5		kg	114.3	114300			1115055	0.102506
Bench	http://www.ikea.com/us/en/catalog/products/60201246/	cm	114	114	43	43	45	45		kg	11.3	11300			220590	0.0512263
sideboard	http://www.ikea.com/us/en/catalog/products/80116596/	cm	145	145	48	48	87	87		kg	75.4	75400			605520	0.124521
sink cabinet	http://www.ikea.com/us/en/catalog/products/30217668/	cm	80	80	47	47	83	83		kg	23.3	23300			312080	0.0746603
kitchen cart	http://www.ikea.com/us/en/catalog/products/00058487/	cm	98	98	57	57	86	86		kg	19.6	19600			480396	0.0407997
Sofa	http://www.ikea.com/us/en/catalog/products/70139107/	cm	165	165	94	94	80	80		kg	57.6	57600			1240800	0.0464217
Book case	http://www.ikea.com/us/en/catalog/products/10208467/	cm	80	80	39	39	202	202		kg	50.4	50400			630240	0.0799695
desk	http://www.ikea.com/us/en/catalog/products/20244851/	cm	120	120	50	50	75	75		kg	25.1	25100			450000	0.0557778
table	http://www.ikea.com/us/en/catalog/products/S39903772/	cm	99	99	52	52	71	71		kg	12.6	12600			365508	0.0344726
cabinet	http://www.ikea.com/us/en/catalog/products/80213583/	cm	90	90	37	37	197	197		kg	47	47000			656010	0.0716452
ktichen island	http://www.ikea.com/us/en/catalog/products/40157485/	cm	120	120	53	53	90	90		kg	32.6	32600			572400	0.0569532
stove	http://www.amazon.com/Amana-Self-Cleaning-Electric-Range-AER5830VAW/dp/B0026RYFHE/ref=sr_1_3?ie=UTF8&qid=1373494029&sr=8-3&keywords=stoves	inches	27.7	70.358	29.9	75.946	46.9	119.126		pounds	162	73481.9			636539	0.11544
riding lawn mower	http://www.homedepot.com/p/t/204652264#specifications	inches	68.75	174.625	45.5	115.57	53.9	136.906		pounds	436	197766			2.76296e+06	0.0715777
Honda Civic	http://automobiles.honda.com/civic-sedan/specifications.aspx?group=dimensions	inches	179.4	455.676	56.5	143.51	69	175.26		pounds	2815	1276860			1.1461e+07	0.111409
hot tub	http://www.homedepot.com/p/Lifesmart-Bermuda-Rock-Solid-Series-Plug-and-Play-Spa-with-13-Jets-Includes-FREE-Energy-Value-Package-THD-BERMUDA/203160981?N=5yc1vZc4id#specifications	inches	32	81.28	71	180.34	61	154.94		pounds	230	104326			2.27112e+06	0.045936
air conditioning compressor	http://www.homedepot.com/p/Winchester-3-Ton-13-SEER-Sweat-Heat-Pump-System-with-17-5-in-Coil-and-30-ft-Line-Set-4RHP36S17-30/203502340?MERCH=RV-_-RV_homepage_rr-2-_-NA-_-203502340-_-N#specifications	inches	34	86.36	40	101.6	34	86.36		pounds	218	98883.1			757738	0.130498
furnace	http://www.homedepot.com/p/Winchester-100-000-BTU-95-5-Multi-Positional-Gas-Furnace-W9M100-421/202771088?N=5yc1vZc4lk#specifications	inches	33	83.82	29.5	74.93	21	53.34		pounds	127	57606.2			335009	0.171954
water heater	http://www.homedepot.com/p/Rheem-Performance-Platinum-50-gal-Tall-12-Year-36-000-BTU-Energy-Star-Ultra-Low-Nox-Natural-Gas-Water-Heater-XG50T12DU36U0/204318423?N=5yc1vZc1tzZ1z0ubbt	inches	23	58.42	59.75	151.765	23	58.42		pounds	180	81646.6			517958	0.157632
Honda Pilot Touring	http://automobiles.honda.com/pilot/specifications.aspx	inches	191.4	486.156	72.4	183.896	78.5	199.39		pounds	4608	2090150			1.78259e+07	0.117254
washing machine	http://www.homedepot.com/p/LG-Electronics-4-0-DOE-cu-ft-High-Efficiency-Front-Load-Washer-in-Graphite-Steel-ENERGY-STAR-WM3470HVA/202988419?N=5yc1vZc3pj	inches	29.75	75.565	38.69	98.2726	27	68.58		pounds	192	87089.7			509273	0.171008
